# Supplementary material for: Women’s and girls’ experiences of menstruation in low- and middle-income countries: A systematic review and qualitative metasynthesis
Source: PubMed Central journal article supplement (PMC6521998; doi:10.1371/journal.pmed.1002803), 2019-05-16
Supplement: pmed.1002803.s003.pdf [file pmed.1002803.s003.pdf]

**S1 Table. Quality of included studies**

**Table 1. Study quality appraisal using the EPPI-Centre tool, with brief notes regarding the rating assigned.**

| Colour Key                                                | 1. Were steps taken to increase rigour in the sampling?                                                                                     | 2. Were steps taken to increase rigour in the data collected?                                                                   | 3. Were steps taken to increase rigour in the analysis of the data?                                                                                                     | 4. Were the findings of the study grounded in/supported by the data?                                                                  | 5. Please rate the findings of the study in terms of their breadth and depth                                                                                 | 6. To what extent does the study privilege the perspectives and experiences of women and girls?                                               |
|-----------------------------------------------------------|---------------------------------------------------------------------------------------------------------------------------------------------|---------------------------------------------------------------------------------------------------------------------------------|-------------------------------------------------------------------------------------------------------------------------------------------------------------------------|---------------------------------------------------------------------------------------------------------------------------------------|--------------------------------------------------------------------------------------------------------------------------------------------------------------|-----------------------------------------------------------------------------------------------------------------------------------------------|
|                                                           | Yes, a fairly thorough attempt was made                                                                                                     | Yes, a fairly thorough attempt was made                                                                                         | Yes, a fairly thorough attempt was made                                                                                                                                 | Good grounding/support                                                                                                                | Good/fair breadth and depth                                                                                                                                  | A lot                                                                                                                                         |
|                                                           | Yes, several steps were taken                                                                                                               | Yes, several steps were taken                                                                                                   | Yes, several steps were taken                                                                                                                                           | Fair grounding support                                                                                                                | Good/fair depth but very little breadth                                                                                                                      | Somewhat                                                                                                                                      |
|                                                           | Yes, a few steps were taken                                                                                                                 | Yes, a few steps were taken                                                                                                     | Yes, a few steps were taken                                                                                                                                             |                                                                                                                                       | Good/fair breadth but very little depth                                                                                                                      | A little                                                                                                                                      |
|                                                           | No, not at all/not stated/can't tell                                                                                                        | No, not at all/not stated/can't tell                                                                                            | No, not at all/not stated/can't tell                                                                                                                                    | Limited grounding/support                                                                                                             | Limited breadth or depth                                                                                                                                     | Not at all                                                                                                                                    |
| <b>Overall trustworthiness, consider questions 1 to 4</b> |                                                                                                                                             |                                                                                                                                 |                                                                                                                                                                         |                                                                                                                                       | <b>Overall usefulness/relevance, consider the <u>review question</u> and questions 5 and 6</b>                                                               |                                                                                                                                               |
| High                                                      |                                                                                                                                             |                                                                                                                                 |                                                                                                                                                                         |                                                                                                                                       | High                                                                                                                                                         |                                                                                                                                               |
| Medium                                                    |                                                                                                                                             |                                                                                                                                 |                                                                                                                                                                         |                                                                                                                                       | Medium                                                                                                                                                       |                                                                                                                                               |
| Low                                                       |                                                                                                                                             |                                                                                                                                 |                                                                                                                                                                         |                                                                                                                                       | Low                                                                                                                                                          |                                                                                                                                               |
| Study ID                                                  | 1. Rigor in sampling                                                                                                                        | 2. Rigor in data collection                                                                                                     | 3. Rigor in analysis                                                                                                                                                    | 4. Findings supported by the data                                                                                                     | 5. Breadth and depth of findings                                                                                                                             | 6. Privileges perspectives of women and girls                                                                                                 |
| Adegbayi 2017                                             | Self-selection through fliers at university campus.                                                                                         | Written narratives offer privacy. Limited probing. Topic guide provided.                                                        | Strong description of analytic process.                                                                                                                                 | Quotations, no identifiers. Themes supported although some linked to past research more so than primary data.                         | Some depth and breadth.                                                                                                                                      | Mix of iterative and deductive approach with reliance on past literature rather than primary quotations for some themes.                      |
| Trustworthiness: Medium                                   |                                                                                                                                             |                                                                                                                                 |                                                                                                                                                                         |                                                                                                                                       | Relevance: Medium                                                                                                                                            |                                                                                                                                               |
| Al Omari 2016                                             | Snowball sampling, many refused. Unclear participant representation.                                                                        | Written journal approach provided privacy and repeat observations. Guiding questions reported.                                  | Two coders. Limited analytic information provided. Differing approaches reported in abstract and methods.                                                               | Rich support of themes with quotations and participant numbers.                                                                       | Good depth of findings, limited breadth.                                                                                                                     | Diary approach was girl-centric. Focus on girls' narratives in analysis.                                                                      |
| Trustworthiness: Medium                                   |                                                                                                                                             |                                                                                                                                 |                                                                                                                                                                         |                                                                                                                                       | Relevance: High                                                                                                                                              |                                                                                                                                               |
| Al-Sabir 1998                                             | Random sampling of regions, followed by purposive sampling of women and adolescent girls.                                                   | Mix of IDIs and FGDs, Topic guide not reported, although development process stated. Results suggest many structured questions. | No stated analytic framework. Data presented descriptively with little analysis apparent.                                                                               | Theme generation and description unclear. Domains of menstrual experience well described by extensive quotes. No participant numbers. | Study describes broad set of behaviours and factors influencing experience. Depth provided through quotations but limited analysis or synthesis into themes. | Perspectives clear in case studies, however analysis limited.                                                                                 |
| Trustworthiness: Medium                                   |                                                                                                                                             |                                                                                                                                 |                                                                                                                                                                         |                                                                                                                                       | Relevance: Medium                                                                                                                                            |                                                                                                                                               |
| Al-Shurbji 2017                                           | Sample identified by community leaders, process unclear. Participants selected from each camp block, but otherwise unclear characteristics. | Data collection tools informed by past research. IDIs until saturation. Full topic guide reported, structured questions.        | Stated use of grounded theory and feminist perspective, but no description of analytic process. No presentation of themes or theory. Saturation noted but not supported | Unclear themes presented. Supportive quotations provided, but numerous strong statements without supporting quotes.                   | No synthesis into themes. Fair breadth of issues presented but limited depth.                                                                                | Attentive to religious context however more focus on author interpretation than participants. Unclear involvement of participants in process. |
| Trustworthiness: Low                                      |                                                                                                                                             |                                                                                                                                 |                                                                                                                                                                         |                                                                                                                                       | Relevance: Medium                                                                                                                                            |                                                                                                                                               |
| Amatya 2018                                               | Convenience sample of volunteers from one school.                                                                                           | Single FGD. Data collection tool designed to triangulate quantitative survey. Semi-                                             | Stated phenomenological and thematic approach. Brief description of analytic process.                                                                                   | Findings provided depth to quantitative methods. No themes, responses presented according to answers to topic questions.              | Single FGD to inform quantitative interpretation. Little breath or depth in analysis.                                                                        | Unclear involvement of women and girls. Author focus on participant perspective.                                                              |

|                 |                                                                                                                                                                   |                                                                                                                                                                    |                                                                                                                                                              |                                                                                                                            |                                                                                                                                 |                                                                                                                          |
|-----------------|-------------------------------------------------------------------------------------------------------------------------------------------------------------------|--------------------------------------------------------------------------------------------------------------------------------------------------------------------|--------------------------------------------------------------------------------------------------------------------------------------------------------------|----------------------------------------------------------------------------------------------------------------------------|---------------------------------------------------------------------------------------------------------------------------------|--------------------------------------------------------------------------------------------------------------------------|
|                 | structured questions explored research questions.                                                                                                                 | No stated saturation in small sample.                                                                                                                              | Supporting quotations provided, no participant numbers.                                                                                                      |                                                                                                                            |                                                                                                                                 |                                                                                                                          |
|                 | Trustworthiness: Low                                                                                                                                              |                                                                                                                                                                    |                                                                                                                                                              | Relevance: Medium                                                                                                          |                                                                                                                                 |                                                                                                                          |
| Behera 2015     | Convenience sample from one school. Specific sample age group. Mix of pre and post menarche and day and boarding students sought.                                 | No ethical approval, informed consent noted. FGDs, unstructured questions provided but elicited limited depth.                                                     | Limited discussion of analytic framework. Themes showed little deviation from topic guide. Attention to divergent cases.                                     | No participant numbers provided. Supportive quotations for themes. Core assertions often supported by multiple quotations. | Broad coverage of experience, but limited depth.                                                                                | FGD only, fair attempt to privilege girls' perspectives.                                                                 |
|                 | Trustworthiness: Medium                                                                                                                                           |                                                                                                                                                                    |                                                                                                                                                              | Relevance: Medium                                                                                                          |                                                                                                                                 |                                                                                                                          |
| Bilani 2015     | Theoretical sampling described, though specific recruitment methods unclear.                                                                                      | Repeat interviews conducted with several respondents. Respondent checking of interview transcripts.                                                                | Multiple analysts read and reread transcripts; respondent validation of analysis; auditable and transparent analysis trail.                                  | Quotes used and tabulated to clarify themes.                                                                               | Findings generally corresponded to categories rather than specific themes in the data.                                          | Analysis focuses on women's service needs and perspectives, but several details of sampling missing.                     |
|                 | Trustworthiness: Medium                                                                                                                                           |                                                                                                                                                                    |                                                                                                                                                              | Relevance: Medium                                                                                                          |                                                                                                                                 |                                                                                                                          |
| Boosey 2014     | Six schools, purposive selection of girls. FGD participants selected by teachers – eldest and most willing.                                                       | FGD (mixed-methods study). Participatory methods stated but none described.                                                                                        | Coding discussed by two researchers. Very limited analysis presented.                                                                                        | No supporting quotations. Limited description of themes.                                                                   | Very limited breadth or depth reported.                                                                                         | Participatory focus stated but unclear. Emphasis on girls recommendations for solutions to improve menstrual experience. |
|                 | Trustworthiness: Low                                                                                                                                              |                                                                                                                                                                    |                                                                                                                                                              | Relevance: Low                                                                                                             |                                                                                                                                 |                                                                                                                          |
| Budhathoki 2018 | Selection of most affected areas and participants. Purposive, though small, sample.                                                                               | Mixed methods study with limited time (10-15 mins, 5 participants) for qualitative collection. Community engagement process.                                       | Clear description of analytic process. Thematic saturation noted, however very limited sample present to achieve this.                                       | Quotations provided, with participant numbers which support identified themes.                                             | Very limited. Small quantity of interviews of short duration. Mixed-methods study with more attention to quantitative findings. | Engagement with community. Limited qualitative component, but attention to women's perspectives in what was done.        |
|                 | Trustworthiness: High                                                                                                                                             |                                                                                                                                                                    |                                                                                                                                                              | Relevance: Medium                                                                                                          |                                                                                                                                 |                                                                                                                          |
| Caruso 2013     | Eight schools in two communities and mix of in and out of school girls. Unstated participant selection.                                                           | Combination of IDIs and FGDs. Guiding socioecological framework but limited information on topic guide.                                                            | No stated analytic approach. Some attention to divergent cases. Themes reflect research questions, no reflexivity noted. Unclear if any iterative coding.    | Quotations provided with participant or FGD numbers. Additional longer excerpts from interviews provided.                  | Socioecological framework approach captured factors at many levels, demonstrating breadth but restricted analytic depth.        | Combination of IDIs and FGDs. Focus on girls' suggested improvements, however unclear theme development.                 |
|                 | Trustworthiness: Medium                                                                                                                                           |                                                                                                                                                                    |                                                                                                                                                              | Relevance: High                                                                                                            |                                                                                                                                 |                                                                                                                          |
| Caruso 2017     | Purposive sampling across life course in multiple communities.                                                                                                    | Free-list interviews and FGDs. Development of FGD tools based on free list interviews.                                                                             | Clear description of analytic process. Some attention to divergent cases.                                                                                    | No participant numbers provided, FGD or free-list interview noted. Extensive quotations support themes.                    | Combination of breadth of sanitation-related challenges and depth.                                                              | Combination of methods to take participant centred approach.                                                             |
|                 | Trustworthiness: High                                                                                                                                             |                                                                                                                                                                    |                                                                                                                                                              | Relevance: Medium: research question regards sanitation                                                                    |                                                                                                                                 |                                                                                                                          |
| Castaneda 1996  | Ethnography. Demographic map drawn to assist diverse sample selection. Participatory observation over 2-month period.                                             | Multiple methodologies including interview and observation. Unclear topic guidance for interviews.                                                                 | Limited description of analytic process beyond stating an ethnographic approach. Reflections on researcher role. Unclear acknowledgement of divergent cases. | Limited quotations, reliance on researcher report. Focus on key terms used in local language.                              | In depth analysis of meanings of fertility and menarche.                                                                        | Focus on key informants, midwives, but combined with observation of interactions with women and girls.                   |
|                 | Trustworthiness: Medium                                                                                                                                           |                                                                                                                                                                    |                                                                                                                                                              | Relevance: Low: limited attention to experience of menstruation.                                                           |                                                                                                                                 |                                                                                                                          |
| Chebii 2018     | Selection of oldest-running school. Teacher selected most appropriate class and all girls invited.                                                                | Multiple FGDs with the same girls, followed by IDIs to discuss private challenges. Topic guide provided with open ended questions.                                 | Clear description of analytic process. Single analyst, some reflexivity noted. Unclear saturation and presentation of themes identified.                     | Thematic structure not clearly presented. Multiple supportive quotations provided including participant identifiers.       | Significant depth and breadth provided.                                                                                         | Multiple data collection strategies and repeated meetings. Girls' perspective sought and privileged.                     |
|                 | Trustworthiness: High                                                                                                                                             |                                                                                                                                                                    |                                                                                                                                                              | Relevance: High                                                                                                            |                                                                                                                                 |                                                                                                                          |
| Chinyama 2019   | Purposive selection of rural schools in two districts in consultation with Education board. Teacher identification of participants according to eligibility only. | FGDs and IDIs. Topic guides provided. Semi-structured, broad range of topics to elicit narrative and answer research questions. Triangulation with key informants. | Some description of analytic process. Unclear saturation in Methods, Discussion states did not reach saturation. Reflexivity unclear.                        | Multiple supporting quotations provided with some participant identifiers. Clear description of themes.                    | Breadth provided with some depth.                                                                                               | Multiple data collection strategies. Girls' perspectives sought and privileged.                                          |
|                 | Trustworthiness: High                                                                                                                                             |                                                                                                                                                                    |                                                                                                                                                              | Relevance: High                                                                                                            |                                                                                                                                 |                                                                                                                          |

|                         |                                                                                                                 |                                                                                                                                           |                                                                                                                                             |                                                                                                                  |                                                                                                                   |                                                                                                                                    |
|-------------------------|-----------------------------------------------------------------------------------------------------------------|-------------------------------------------------------------------------------------------------------------------------------------------|---------------------------------------------------------------------------------------------------------------------------------------------|------------------------------------------------------------------------------------------------------------------|-------------------------------------------------------------------------------------------------------------------|------------------------------------------------------------------------------------------------------------------------------------|
| Chothe 2014             | Unclear selection of schools. Very high refusal rates.                                                          | Data collection method well matched to research question. Limited design (students asking questions).                                     | Unclear analytic approach. Iterative thematic approach apparent and well suited to the question.                                            | Themes identified well supported by example questions. No participant numbers provided.                          | Broad findings. Very limited depth in analysis. Narrow picture provided by girls' questions.                      | Single activity: focus on girls' generated question. No steps taken to understand knowledge of girls who did not ask a question.   |
| Trustworthiness: Medium |                                                                                                                 |                                                                                                                                           | Relevance: Low                                                                                                                              |                                                                                                                  |                                                                                                                   |                                                                                                                                    |
| Crawford 2014           | Convenience sample of university and NGO office women. English fluency required.                                | Unclear topic guide. Mix of interviews and FGDs.                                                                                          | Clear description of analytic process.                                                                                                      | Participant identifiers provided. Themes well supported with quotations.                                         | Good depth and breadth for research question. However, narrow for purpose of this review.                         | Combination of interviews and focus groups. Inductive coding approach.                                                             |
| Trustworthiness: Medium |                                                                                                                 |                                                                                                                                           | Relevance: Medium                                                                                                                           |                                                                                                                  |                                                                                                                   |                                                                                                                                    |
| Crichton 2013           | Single informal settlement. Purposive sampling with teachers and community members to identify participants.    | Combination of IDIs and FGDs. Some information on topic guide presented.                                                                  | Clear use of inductive and deductive approaches. Unclear saturation.                                                                        | Themes well supported by quotes, including participant or FGD number.                                            | Depth and breadth presented.                                                                                      | Combination of IDIs and FGDs. Consultation with key informants. Mix of inductive and deductive approach with past literature.      |
| Trustworthiness: High   |                                                                                                                 |                                                                                                                                           | Relevance: High                                                                                                                             |                                                                                                                  |                                                                                                                   |                                                                                                                                    |
| da Silva Bretas 2011    | Purposive sample (unclear characteristics) of students participating in sexuality education outreach activity.  | Single FGD repeated for 3 sessions. Single prompting question on experience of menstruation, unclear prompts.                             | Clear report of analytic position/theory, some description of analytic process. Unclear saturation, reflexivity.                            | Quotations for broad themes, but not interpretation provided.                                                    | Some breadth and depth provided. Depth driven by review of past literature, unclear participant focus.            | Unclear. Integration of results presentation with past literature with little reflexivity on interpretation.                       |
| Trustworthiness: Medium |                                                                                                                 |                                                                                                                                           | Relevance: Low                                                                                                                              |                                                                                                                  |                                                                                                                   |                                                                                                                                    |
| Daniels 2016            | Purposive sampling of areas then random sampling of participants, identified by teachers.                       | Structured IDIs and FGDs, little room for variation. Detailed topic guide provided. Expert consultation and literature to generate items. | Stated grounded theory approach in analysis, but not in data collection methods. Mix of deductive and inductive coding.                     | Extensive quotes provided, some participant identification.                                                      | Good depth and breadth of findings. Findings across knowledge, practices, impacts, support structure, management. | Mix of inductive and deductive coding. Use of FGDs and IDIs. Triangulation with key informants but focussed on girls' experiences. |
| Trustworthiness: High   |                                                                                                                 |                                                                                                                                           | Relevance: High                                                                                                                             |                                                                                                                  |                                                                                                                   |                                                                                                                                    |
| Devnarain 2011          | Purposive selection of a single school. Unclear participant selection. 10 students.                             | Participatory activity to map water activities. Used to generate questions for FGDs. Limited information on FGD facilitation.             | Limited information on analytic approach. Mix of inductive and deductive coding. No notes of saturation or reflexivity.                     | Moderate support through quotations to support key assertions. Participant identifiers reported.                 | Some breadth and depth of findings.                                                                               | Use of participatory activity in combination with FGD to focus on girls' experiences.                                              |
| Trustworthiness: Medium |                                                                                                                 |                                                                                                                                           | Relevance: Low to review question                                                                                                           |                                                                                                                  |                                                                                                                   |                                                                                                                                    |
| Dhingra 2009            | Snowball sampling of families, random sampling of girls (unclear method)                                        | IDIs and small group (2-3 interviews), unclear mix of structured questions – broad topic provided.                                        | 'Content analysis' reported. No description of analytic process and unclear from results presentation.                                      | Presentation focused on quantitative descriptors. Few quotations provided with no participant identification.    | Very little breadth or depth. Little attention to qualitative analysis, largely quantified.                       | Unclear. Interviews with broad topic guide. Results do not privilege girls' perspectives.                                          |
| Trustworthiness: Low    |                                                                                                                 |                                                                                                                                           | Low:                                                                                                                                        |                                                                                                                  |                                                                                                                   |                                                                                                                                    |
| Do Amaral 2011          | Snowball sampling. Unclear objectives for diversity of participants, most participants connected to university. | FGDs. Divided by age groups. Pilot tested and overview of questions provided.                                                             | Description of process. Stated framework. Some missing details of analysis and saturation.                                                  | Rich quotations provided, context from past literature. No participant identifiers                               | Good depth, some breadth.                                                                                         | Mix of participant focus and past theory and literature.                                                                           |
| Trustworthiness: Medium |                                                                                                                 |                                                                                                                                           | Relevance: Medium                                                                                                                           |                                                                                                                  |                                                                                                                   |                                                                                                                                    |
| Dolan 2014              | Range of regions included. Unclear participant identification and recruitment.                                  | FGD and IDI content directed by consultation with stakeholders. No description of topic guide.                                            | Analytic approach not reported. Narrative description of findings. No identified themes.                                                    | Unclear themes, however narrative was supported by quotations, no participant identifiers.                       | Mixed-methods approach but narrative treatment of findings provided some depth and breadth.                       | Key informant FGDs used to inform questions, followed by emphasis on girls' reports.                                               |
| Trustworthiness: Low    |                                                                                                                 |                                                                                                                                           | Relevance: Medium                                                                                                                           |                                                                                                                  |                                                                                                                   |                                                                                                                                    |
| Ellis 2016              | Data collection in 13 schools in 3 regions. Urban and rural settings. Purposive participant selection.          | FGDs with some information regarding topic guide reported. Topic guide underwent extensive development process.                           | Limited report of analytic approach. Mix of deductive and inductive coding, with follow up paper appearing to have only deductive approach. | Some supporting quotations, more provided in source report than peer-review paper. Some participant identifiers. | Limited depth. Comprehensive coverage of WASH challenges and girls' experiences.                                  | Deductive approach, with experiences categorized according to framework. FGDs only. Part of longer process of investigation.       |
| Trustworthiness: Medium |                                                                                                                 |                                                                                                                                           | Relevance: High                                                                                                                             |                                                                                                                  |                                                                                                                   |                                                                                                                                    |
| Garg 2001               | Range of ages, all participants symptomatic of RTI. Unclear participant recruitment.                            | Some information provided on topic guide. IDIs and FGDs.                                                                                  | Analytic process not reported.                                                                                                              | Supporting quotations provided, no participant identifiers.                                                      | Breadth and some depth of findings.                                                                               | Focus on women's experience. Consultation with key informants and health services.                                                 |
| Trustworthiness: Medium |                                                                                                                 |                                                                                                                                           | Relevance: High                                                                                                                             |                                                                                                                  |                                                                                                                   |                                                                                                                                    |

|                         |                                                                                                                          |                                                                                                                                                                           |                                                                                                                                                    |                                                                                                                                                                               |                                                                                                                              |                                                                                                                                                                     |
|-------------------------|--------------------------------------------------------------------------------------------------------------------------|---------------------------------------------------------------------------------------------------------------------------------------------------------------------------|----------------------------------------------------------------------------------------------------------------------------------------------------|-------------------------------------------------------------------------------------------------------------------------------------------------------------------------------|------------------------------------------------------------------------------------------------------------------------------|---------------------------------------------------------------------------------------------------------------------------------------------------------------------|
| Girod 2017              | Purposive selection of six schools on range of demographic and environmental factors. Participants selected by teachers. | Participatory FGD activities, anonymous question session.                                                                                                                 | Well described analytic process.                                                                                                                   | Supporting quotations for some points, although some assertions made without supporting evidence. Participant identifiers provided.                                           | Good breath and some depth of analysis.                                                                                      | Participatory activities to encourage participation. Mixed with facility observation and key informants.                                                            |
| Trustworthiness: High   |                                                                                                                          |                                                                                                                                                                           |                                                                                                                                                    | Relevance: High                                                                                                                                                               |                                                                                                                              |                                                                                                                                                                     |
| Guerry 2013             | Data collection in two schools. Only seven interviews. Mixed methods with greater emphasis on quantitative analysis.     | Interview topic guide provided. Private locations. IDIs only and limited sample.                                                                                          | Described analytic process and discussed reflexivity. Unclear saturation.                                                                          | Supporting quotations provided with participant identifiers. Limited description of themes.                                                                                   | Limited attention to depth or breadth of qualitative analysis and more emphasis on quantitative results.                     | Limited number of structured interviews. Unclear prioritisation of girls' experience.                                                                               |
| Trustworthiness: Medium |                                                                                                                          |                                                                                                                                                                           |                                                                                                                                                    | Relevance: Medium                                                                                                                                                             |                                                                                                                              |                                                                                                                                                                     |
| Hosseini 2018           | Unclear recruitment of sample of university students. No further sample description provided.                            | Limited information provided on topic guide – menarche and menstruation experience. Informed by literature review.                                                        | Analysis clearly described. Validation with senior researchers and participants (although method unclear). Saturation unclear.                     | Themes supported by quotations (no participant identifiers). Restricted author description of themes.                                                                         | Some depth and breadth of results presented.                                                                                 | Author notes validation of themes with participants but unclear method. IDIs, women's reports clear.                                                                |
| Trustworthiness: Medium |                                                                                                                          |                                                                                                                                                                           |                                                                                                                                                    | Relevance: Medium                                                                                                                                                             |                                                                                                                              |                                                                                                                                                                     |
| Ismail 2016             | University students only. Recruited through lectures. Self-selected. .                                                   | Limited information regarding topic guide. Questions derived from literature. Three FGDs.                                                                                 | Discourse analysis stated, little description of analytic process, reflexivity or saturation.                                                      | Themes well supported by quotations with participant identifiers. Findings integrated with past literature.                                                                   | Depth of discourses described as per research question, and good breadth according to research question.                     | FGDs only and integration with literature for both question creation and interpretation of results. Women's reports clear in presentation of quotations and themes. |
| Trustworthiness: Low    |                                                                                                                          |                                                                                                                                                                           |                                                                                                                                                    | Relevance: Medium                                                                                                                                                             |                                                                                                                              |                                                                                                                                                                     |
| IWDA 2017               | Purposive sampling via partner organization networks. Largely convenience sample.                                        | FGDs and IDI with girls and women. Topic guide informed by past research and theory. Participatory activities including body mapping, community mapping, 'ideal' latrine. | Inductive coding framework during data collection and followed up afterwards. Findings validated by local research team. Discussion of saturation. | Report notes saturation was not reached. Supporting quotations provided with some identification. High rating for peer-reviewed publication on restrictive practices.         | Good breadth, some depth.                                                                                                    | Use of participatory activities and some interviews. Local researcher engagement in a analytic feedback. Mix of focus on women's reports and field observation.     |
| Trustworthiness: Medium |                                                                                                                          |                                                                                                                                                                           |                                                                                                                                                    | Relevance: Medium                                                                                                                                                             |                                                                                                                              |                                                                                                                                                                     |
| Jewitt 2014             | Nine schools with range of characteristics. Rural and urban areas. Unclear participant sampling.                         | Multiple participatory activities. Combination of IDIs and FGDs.                                                                                                          | Unstated analytic strategy, reflexivity or saturation.                                                                                             | Integration with past literature. Supportive quotations provided.                                                                                                             | Depth and breadth described.                                                                                                 | Participatory activities prioritised girls' perspectives. Triangulation with key informants.                                                                        |
| Trustworthiness: Medium |                                                                                                                          |                                                                                                                                                                           |                                                                                                                                                    | Relevance: High                                                                                                                                                               |                                                                                                                              |                                                                                                                                                                     |
| Kansal 2016             | Multi-stage sampling for quantitative survey. FGD participants randomly sampled from survey, balanced characteristics.   | FGDs. No topic guide reported, very little information on questions or objectives for FGDs.                                                                               | No clear description of analytic process. No presentation of themes in results.                                                                    | No presentation of themes. Largely quantified qualitative responses. Few supporting quotations without identifiers.                                                           | Very little depth or breadth presented.                                                                                      | FGDs only. Largely quantitative study. Qualitative data to illustrate quantitative findings rather than participant perspectives.                                   |
| Trustworthiness: Low    |                                                                                                                          |                                                                                                                                                                           |                                                                                                                                                    | Relevance: Low                                                                                                                                                                |                                                                                                                              |                                                                                                                                                                     |
| Krishnan 2016           | Unclear participant recruitment for FGDs. IDIs selected from women-headed households purposively and followed up.        | Unstructured interviews, FGDs with participatory learning and action tools. Some information on topic guide, no description of participatory activities.                  | Thematic analysis, but little information on process described. No attention to divergent cases.                                                   | No supporting quotations provided. Some description of themes and insights with links to past literature. Unclear analytic strategy and use of primary data to derive themes. | Limited breadth and depth of presented themes. Insights split between description of sites and thematic analysis of content. | No use of quotations, methodology describes extensive consultation. Poor translation to findings.                                                                   |
| Trustworthiness: Low    |                                                                                                                          |                                                                                                                                                                           |                                                                                                                                                    | Relevance: Low                                                                                                                                                                |                                                                                                                              |                                                                                                                                                                     |
| Kyomugisha 1999         | Participant selection not reported.                                                                                      | Participatory listing exercise. Use of IDIs, FGDs with girls, parents and teachers. Unclear composition.                                                                  | Unstated analytic approach. Two stage process of listing and interviews. Unclear derivation of themes.                                             | Supporting quotations provided, no participant identifiers. No derivation of themes.                                                                                          | Restricted research question. No themes presented. Some depth on single issue.                                               | Mix of girls' and teachers/parents experience. Unclear involvement of girls in study process.                                                                       |
| Trustworthiness: Low    |                                                                                                                          |                                                                                                                                                                           |                                                                                                                                                    | Relevance: Low                                                                                                                                                                |                                                                                                                              |                                                                                                                                                                     |
| Lahme 2016              | Three schools. Schools selected for varied characteristics. Purposive sampling of participants.                          | FGDs. Description of topic guidance. Concurrent analysis and data collection. Findings validated with participants.                                                       | Clear description of analytic process and participant validation. Notes on reflexivity.                                                            | Supporting quotations provided, no participant identifiers. Consistency between themes and supporting quotations.                                                             | Broad and deep themes presented consistent with research question.                                                           | Participants provided feedback on preliminary analysis. Prioritisation of women's perspective.                                                                      |
| Trustworthiness: High   |                                                                                                                          |                                                                                                                                                                           |                                                                                                                                                    | Relevance: High                                                                                                                                                               |                                                                                                                              |                                                                                                                                                                     |

|                         |                                                                                                                                           |                                                                                                                                                      |                                                                                                                                                               |                                                                                                                                                    |                                                                                                |                                                                                                                                                          |
|-------------------------|-------------------------------------------------------------------------------------------------------------------------------------------|------------------------------------------------------------------------------------------------------------------------------------------------------|---------------------------------------------------------------------------------------------------------------------------------------------------------------|----------------------------------------------------------------------------------------------------------------------------------------------------|------------------------------------------------------------------------------------------------|----------------------------------------------------------------------------------------------------------------------------------------------------------|
| Long 2013               | Ten schools and surrounding communities. Schools purposively sampled. Unclear participant sampling.                                       | FGDs and IDIs. Some information on topic guide. Participatory board game and small group activities to promote comfort.                              | Unclear analytic process. Deductive approach from existing framework. Stakeholders provided feedback on study results. FGDs with participants for validation. | Supporting quotations with some participant identification. Supporting photos and case studies.                                                    | Extensive breadth and so depth into identified findings.                                       | Unclear deductive vs inductive coding. Mix of girls' and informant perspectives.                                                                         |
| Trustworthiness: Medium |                                                                                                                                           |                                                                                                                                                      |                                                                                                                                                               |                                                                                                                                                    | Relevance: High                                                                                |                                                                                                                                                          |
| Mason 2013              | Six schools, all eligible girls per school participated.                                                                                  | Some description of topic guide topics. FGDs.                                                                                                        | Thorough description of analytic process. Consideration of saturation.                                                                                        | Themes supported by quotations and participant numbers. Consistency between themes and quotations.                                                 | Breadth and depth of findings.                                                                 | Unclear development of tools. Strong reliance on girls' experiences, triangulation key informants.                                                       |
| Trustworthiness: High   |                                                                                                                                           |                                                                                                                                                      |                                                                                                                                                               |                                                                                                                                                    | Relevance: High                                                                                |                                                                                                                                                          |
| McMahon 2011            | Six rural schools, unclear sampling strategy. Teachers and school staff selected participants.                                            | FGDs. Open ended interview questions. Very little information on topic guide provided.                                                               | Thorough description of analytic process. Notes saturation and two-phase design. Reflection on researcher role.                                               | Supporting quotations provided, no participant identification.                                                                                     | Coverage of domains, and depth of themes presented.                                            | Unclear development of tools. Strong reliance on girls' experiences, triangulation with teacher perspectives.                                            |
| Trustworthiness: Medium |                                                                                                                                           |                                                                                                                                                      |                                                                                                                                                               |                                                                                                                                                    | Relevance: High                                                                                |                                                                                                                                                          |
| Miiri 2018              | Four purposively selected schools. Random sample of girls from each grade level.                                                          | Some information on topic guide. Use of participatory methods noted. FGDs followed up with IDIs.                                                     | Thorough description of analytic process. Reflexivity and saturation absent. Steps taken to ensure discussion and reliability across coders.                  | Supportive quotations provided with focus group numbers. Presentation of qualitative themes integrated with quantitative results.                  | Some breadth and depth. Mixed-methods approach, and restricted space for qualitative findings. | Mix of FGDs and IDIs, privileging of girls' experiences, triangulation with key informants.                                                              |
| Trustworthiness: Medium |                                                                                                                                           |                                                                                                                                                      |                                                                                                                                                               |                                                                                                                                                    | Relevance: High                                                                                |                                                                                                                                                          |
| Morowatisharifabad 2018 | Unclear school selection (both private and public), unclear participant selection                                                         | Limited information on topic guide. Interviews only. Both girls and parents interviewed (unclear if connected). Stated follow ups with participants. | Clear description of analytic process, multiple coders. Data collection continued until saturation.                                                           | Supportive quotations provided. Themes checked with participants and experts. Participant identifiers reported.                                    | Specific research question; breadth provided for this question. Some depth.                    | Validation of findings with research participants. Multiple perspectives from girls and parents and key informants. Participants checked themes.         |
| Trustworthiness: Medium |                                                                                                                                           |                                                                                                                                                      |                                                                                                                                                               |                                                                                                                                                    | Relevance: High                                                                                |                                                                                                                                                          |
| Morrison 2016           | Twelve schools in mix of areas. Unclear selection of participants.                                                                        | Pair interviews, FGDs used game, storytelling and body mapping to enhance communication. Menstrual products distributed for discussion.              | Thorough description of analytic process, identification of deviant cases. Multiple coders.                                                                   | Supporting quotations provided with participant numbers.                                                                                           | Breadth and depth of findings presented.                                                       | Mix of group interviews and FGDs. Participatory activities. Triangulation with key informants but privileging of girls' experiences.                     |
| Trustworthiness: High   |                                                                                                                                           |                                                                                                                                                      |                                                                                                                                                               |                                                                                                                                                    | Relevance: High                                                                                |                                                                                                                                                          |
| Mumtaz 2016             | Implementing partner selected sites. One school. Out of school girls identified by social worker. Unclear recruitment of in school girls. | Participatory activities in FGDs. Multiple sessions with girls. Menstrual stories, brainstorming WASH facilities.                                    | Some description of analytic process. Limited reliability checks, no reflection on reflexivity, deviant cases.                                                | Quotations provided with participant identifiers.                                                                                                  | Good breadth of coverage and some depth.                                                       | Multiple participatory activities over many days. Triangulation with observation and key informants. Girls' experience privileged.                       |
| Trustworthiness: Medium |                                                                                                                                           |                                                                                                                                                      |                                                                                                                                                               |                                                                                                                                                    | Relevance: High                                                                                |                                                                                                                                                          |
| Naeem 2015              | Six schools selected in two provinces. School going girls. Unclear participant selection.                                                 | FGDs with girls. No information on topic guide or process.                                                                                           | No stated/clear analytic process.                                                                                                                             | No supporting quotations provided. Only observational information and key informant reports.                                                       | Breadth of issues, but no depth and no supporting quotations.                                  | Unclear.                                                                                                                                                 |
| Trustworthiness: Low    |                                                                                                                                           |                                                                                                                                                      |                                                                                                                                                               |                                                                                                                                                    | Relevance: Low                                                                                 |                                                                                                                                                          |
| Nanda 2016              | Selection of urban and rural schools, otherwise unclear. Teachers and school officials identified adolescents for participation.          | FGDs. No presentation of topic guide some description on topics discussed.                                                                           | No stated analytic process.                                                                                                                                   | Illustrative quotes presented. No participant numbers.                                                                                             | Reasonable breadth and some depth.                                                             | Unclear FGD activities. Emphasis on girls' voices. Triangulation with key informants.                                                                    |
| Trustworthiness: Medium |                                                                                                                                           |                                                                                                                                                      |                                                                                                                                                               |                                                                                                                                                    | Relevance: High                                                                                |                                                                                                                                                          |
| Narayan 2001            | All schools selected in urban and rural areas. Schoolgirls 12 – 17 and older women. Unclear participant selection.                        | IDIs and FGD. No presentation of topic guide. Topics of interest briefly discussed.                                                                  | No stated analytic process.                                                                                                                                   | No illustrative quotes, no participant identification. No themes presented only narrative description of initiation process and quantitative data. | Limited breadth and depth. No supporting quotations.                                           | Participatory activities included during qualitative interviewing (e.g. body mapping). Quantitative survey tool developed based on qualitative findings. |
| Trustworthiness: Low    |                                                                                                                                           |                                                                                                                                                      |                                                                                                                                                               |                                                                                                                                                    | Relevance: Low                                                                                 |                                                                                                                                                          |

|                            |                                                                                                                                                                                         |                                                                                                                                                                       |                                                                                                                                   |                                                                                                                                                            |                                                                                                     |                                                                                                                                                                   |
|----------------------------|-----------------------------------------------------------------------------------------------------------------------------------------------------------------------------------------|-----------------------------------------------------------------------------------------------------------------------------------------------------------------------|-----------------------------------------------------------------------------------------------------------------------------------|------------------------------------------------------------------------------------------------------------------------------------------------------------|-----------------------------------------------------------------------------------------------------|-------------------------------------------------------------------------------------------------------------------------------------------------------------------|
| Nechitilo 2016             | Selection of schools representing language groups, with poorer WASH facilities. Self-selected volunteer participants recruited                                                          | FGDs and IDIs. Very broad topic guide provided. Validation meetings with sub-set of participants.                                                                     | Analytic process reported. Deductive use of existing codes, some inductive themes.                                                | Illustrative quotations presented with participant identification and stories.                                                                             | Extensive breadth of findings, some analytic depth.                                                 | Deductive coding based on work in other locations. Validation meetings with participants. Triangulation with key informants. Multiple data collection strategies. |
| Trustworthiness: Medium    |                                                                                                                                                                                         |                                                                                                                                                                       |                                                                                                                                   |                                                                                                                                                            | Relevance: High                                                                                     |                                                                                                                                                                   |
| Padmanadbhanu-<br>nni 2017 | Undergraduate or postgraduate students. Study advertised on student notice boards and mailing lists – self-selected participants.                                                       | 5 IDIs, 3 FGDs. No discussion of saturation. Example questions provided indicative of approach.                                                                       | Description of analytic process. Notes checking for consistency and divergent cases. Independent audit of analytic process.       | Supporting/illustrative quotations provided. No participant identifiers of IDI or FGD.                                                                     | Reasonable depth and breadth.                                                                       | Mix of IDIs and FGDs. Focus on women's experiences. Unclear process of question development.                                                                      |
| Trustworthiness: Medium    |                                                                                                                                                                                         |                                                                                                                                                                       |                                                                                                                                   |                                                                                                                                                            | Relevance: Medium                                                                                   |                                                                                                                                                                   |
| Parker 2014                | Girls selected by teachers. Women asked to volunteer (unclear recruitment). Camps selected to vary on size, age and geography.                                                          | FGDs with women and girls. Noted emphasis on views of the community and action research, however no description of topic guide or question development.               | Reflexivity throughout and stated efforts to reduce bias by looking for divergent cases. However, analytic process not described. | Supporting quotations provided although not for all key points, some participant identification.                                                           | Broad findings, some depth for included themes.                                                     | Stated participatory approach, unclear involvement of population in reflecting on findings. Focus on women and girls' triangulated with key informants.           |
| Trustworthiness: Medium    |                                                                                                                                                                                         |                                                                                                                                                                       |                                                                                                                                   |                                                                                                                                                            | Relevance: High                                                                                     |                                                                                                                                                                   |
| Pillitteri 2011            | Seven schools, mix of characteristics. Unclear participant selection.                                                                                                                   | Participatory group workshops. Toilet drawing, list of priorities, writing first menstrual experience, anonymous questions, puberty curriculum.                       | No stated analytic approach. Unclear deductive or inductive process.                                                              | Supporting quotations provided with identifiers. Unclear mix of findings from girls compared to past research, key informants and researcher observation.  | Broad finding, little reciprocal translation from interviews in depth.                              | Unclear themes from girls compared to past research.                                                                                                              |
| Trustworthiness: Medium    |                                                                                                                                                                                         |                                                                                                                                                                       |                                                                                                                                   |                                                                                                                                                            | Relevance: Medium                                                                                   |                                                                                                                                                                   |
| Person 2014                | Schools in three regions, selected for sufficient size and age of students. Unclear participant selection or characteristics.                                                           | Mix of FGDs and IDIs, key informant interviews. Questions piloted with multiple respondents. Broad topic guide provided.                                              | No stated analytic approach. No report of analytic process. NO reflexivity, saturation.                                           | Limited themes presented. Unclear attention to divergence. Supporting quotations provided (no participant identifiers)                                     | Breadth of findings but very little analytic depth. Categorical identification of 'what is needed'. | Tool piloted. Triangulation between girls, parents, key informants, community actors. Some prioritisation of girls' perspectives.                                 |
| Trustworthiness: Low       |                                                                                                                                                                                         |                                                                                                                                                                       |                                                                                                                                   |                                                                                                                                                            | Relevance: Medium                                                                                   |                                                                                                                                                                   |
| Rheinlander 2018           | Single community, two schools. Teachers selected girls for participation (who were willing to talk openly about the subject). Selected girls identified 3-4 friends to join discussion. | Emphasis on interaction with community and triangulation. FGDs with girls. Thematic guide reported including use of vignettes. Transect walks.                        | Clear description of analytic process.                                                                                            | Supporting quotations provided. No participant identification. Multiple responses within FGDs displayed for strong illustration of themes.                 | Breadth and depth of themes provided.                                                               | Unclear process of question development, guided largely by past research. Prioritization of girls' perspectives.                                                  |
| Trustworthiness: High      |                                                                                                                                                                                         |                                                                                                                                                                       |                                                                                                                                   |                                                                                                                                                            | Relevance: High                                                                                     |                                                                                                                                                                   |
| Suduvac 2017               | Single focus group in single school. Participants with dignity kits selected, poor concordance with objectives to understand experience.                                                | Mix with desk review and quantitative survey. Limited information provided.                                                                                           | No stated analytic process.                                                                                                       | Supportive quotations provided, no participant identifiers.                                                                                                | Breadth, very limited depth.                                                                        | Single focus group only, unclear question derivation.                                                                                                             |
| Trustworthiness: Low       |                                                                                                                                                                                         |                                                                                                                                                                       |                                                                                                                                   |                                                                                                                                                            | Relevance: Low                                                                                      |                                                                                                                                                                   |
| Schmitt 2017               | Two different humanitarian populations. Purposive sampling for diverse age groups, ethnicity and living situation.                                                                      | FGDs with girls and women, and participatory mapping activities. Some information on topic guide. Map of communities and identify locations for menstrual activities. | Description of analytic process provided. Unclear reflexivity or saturation. Unclear identification of divergent cases.           | Some supportive quotations provided. No participant identifiers. (more quotations from KIIs than women and girls, no recording of FGDs to support privacy) | Good mix of breadth and depth.                                                                      | Mix of focus between women and girls experience and key informants.                                                                                               |
| Trustworthiness: High      |                                                                                                                                                                                         |                                                                                                                                                                       |                                                                                                                                   |                                                                                                                                                            | Relevance: High                                                                                     |                                                                                                                                                                   |
| Scorgie 2016               | Sites selected based on relationships with stakeholder in the region. Participants selected through social network mapping from larger study.                                           | Photovoice, participatory workshops (FGD including body mapping) and IDIs.                                                                                            | Strong description of analytic process.                                                                                           | Supporting quotations provided with participant identifiers and descriptions.                                                                              | Strong mix of breadth and depth.                                                                    | Participatory and photo-voice approach privileges women's lived experiences.                                                                                      |
| Trustworthiness: High      |                                                                                                                                                                                         |                                                                                                                                                                       |                                                                                                                                   |                                                                                                                                                            | Relevance: High                                                                                     |                                                                                                                                                                   |

|                         |                                                                                                                                                                                      |                                                                                                                                                         |                                                                                                                                    |                                                                                                                              |                                                                                                                     |                                                                                                                                                                          |
|-------------------------|--------------------------------------------------------------------------------------------------------------------------------------------------------------------------------------|---------------------------------------------------------------------------------------------------------------------------------------------------------|------------------------------------------------------------------------------------------------------------------------------------|------------------------------------------------------------------------------------------------------------------------------|---------------------------------------------------------------------------------------------------------------------|--------------------------------------------------------------------------------------------------------------------------------------------------------------------------|
| Secor-Turner 2016       | Participants recruited from single community and recruited through teachers and community members.                                                                                   | IDIs. Topic guide provided. Girls in schools invited to submit written questions.                                                                       | Adequate description of analytic process. Engagement with community nurse in study design.                                         | Supporting quotations provided. No participant identifiers.                                                                  | Limited word length. Some breadth and depth provided.                                                               | Engagement with community and focus on girls' experiences.                                                                                                               |
| Trustworthiness: Medium |                                                                                                                                                                                      |                                                                                                                                                         |                                                                                                                                    |                                                                                                                              | Relevance: Medium                                                                                                   |                                                                                                                                                                          |
| Singh 2006              | Four FGDs. Unclear participant recruitment.                                                                                                                                          | Multiple key informant interviews used to inform interview schedule. No description of topic guide provided.                                            | No description of analytic process.                                                                                                | Thematic groupings supported by illustrative quotations. No participant numbers.                                             | Some breadth, limited depth.                                                                                        | Development of questions through engagement with key informants. Reporting privileges women.                                                                             |
| Trustworthiness: Low    |                                                                                                                                                                                      |                                                                                                                                                         |                                                                                                                                    |                                                                                                                              | Relevance: Medium                                                                                                   |                                                                                                                                                                          |
| Sommer 2009             | Two districts (rural and urban). School and vocation training centre in each district. Girls selected by teachers informed to support diverse sample.                                | Participatory activities. Menstrual narratives (written), puberty questions, designing 'growing up' curriculum. Multiple meetings with students.        | Description of analytic process. Single coder only. Unclear saturation, reflexivity, divergent cases.                              | Supporting excerpts provided with participant identifiers.                                                                   | Extensive breadth and depth facilitated by three publications.                                                      | Unclear derivation of activities and questions, privileging of girls' experiences and perspectives throughout.                                                           |
| Trustworthiness: High   |                                                                                                                                                                                      |                                                                                                                                                         |                                                                                                                                    |                                                                                                                              | Relevance: High                                                                                                     |                                                                                                                                                                          |
| Sommer 2015             | Four countries selected through engaged partners. Mix of rural and urban sites in each country.                                                                                      | Participatory activities (menstrual stories, brainstorming how school environment could be improved, 'perfect toilet'). Multiple meetings over 4 weeks. | Description of analytic process. Feedback from experts. Ongoing analysis. Unclear divergent cases or reflexivity.                  | Supporting quotations provided, some participant identification. Some findings lack supportive quotations. .                 | Breadth and some depth provided across two publications.                                                            | Activities based on past research. Multiple meetings with girls and activities. Input from local experts noted in data analysis.                                         |
| Trustworthiness: High   |                                                                                                                                                                                      |                                                                                                                                                         |                                                                                                                                    |                                                                                                                              | Relevance: High                                                                                                     |                                                                                                                                                                          |
| Sosa-Sanchez 2014       | Theoretical sampling in four different neighbourhoods from one state.                                                                                                                | IDI supported by topic guide provided, informed consent and ongoing analysis.                                                                           | Strong description of analytic process with attention to contextual contingencies and deviant cases.                               | Extensive quotations provided.                                                                                               | Good depth and breadth of findings offer theoretical insights and engagement with diverse viewpoints.               | Women's perspectives clear and accounted for in reflexivity.                                                                                                             |
| Trustworthiness: High   |                                                                                                                                                                                      |                                                                                                                                                         |                                                                                                                                    |                                                                                                                              | Relevance: High                                                                                                     |                                                                                                                                                                          |
| Timaru 2015             | 5 countries, but different studies undertaken. Report & publication provide 'summary of findings'. Unclear participant selection – limited methodological reporting for any country. | FGDs with girls in some locations. Very limited methodological reporting. Unclear FGD questions and process.                                            | No stated analytic strategy for reporting across findings or for individual studies reported on.                                   | Some questions provided. Unclear theme derivation. Quotes largely provided as illustrative to support quantitative findings. | Not adequately reported.                                                                                            | Unclear. Reporting largely dependent on quantitative data with little integration of qualitative findings.                                                               |
| Trustworthiness: Low    |                                                                                                                                                                                      |                                                                                                                                                         |                                                                                                                                    |                                                                                                                              | Relevance: Low                                                                                                      |                                                                                                                                                                          |
| Tegegne 2014            | Participants selected from different school clubs. Drop outs purposively selected. All participants recruited through female teachers. Unclear school selection.                     | IDIs (n=5) and 4 FGDs. Some information regarding topic guide provided.                                                                                 | Clear description of analytic process. Saturation noted. Discussion between investigators. Unclear reflexivity or divergent cases. | Supporting quotations provided, with some identification. Mixed methods reporting.                                           | Mixed methods reporting, limited space available for in-depth qualitative analysis. Breadth but lacking some depth. | Unclear development of topic guide or input from women and girls. Some privileging of girls' experiences, mixed with pre-formed survey questions from quantitative work. |
| Trustworthiness: Medium |                                                                                                                                                                                      |                                                                                                                                                         |                                                                                                                                    |                                                                                                                              | Relevance: Medium                                                                                                   |                                                                                                                                                                          |
| Thakur 2014             | Unclear participant selection alongside random sample design for survey.                                                                                                             | No topic guide for FGDs provided. Pre-testing of survey noted, but unclear for FGDs.                                                                    | No description of analytic process beyond 'content analysis' no description of themes.                                             | Few quotations to illustrate quantitative findings.                                                                          | Some breadth but largely qualitative. Very little depth.                                                            | Qualitative used to illustrate quantitative rather than for in depth analysis. Little privileging of participant perspectives.                                           |
| Trustworthiness: Low    |                                                                                                                                                                                      |                                                                                                                                                         |                                                                                                                                    |                                                                                                                              | Relevance: Low                                                                                                      |                                                                                                                                                                          |
| Trinies 2015            | Eight urban and rural schools in two regions. Schools selected purposively. Study staff selected participants.                                                                       | IDIs with girls. Very short description of topic guide.                                                                                                 | Brief description of analytic process. Unclear discussion between researchers, saturation.                                         | Supporting quotations provided, with some participant identification.                                                        | Adequate depth and some breadth provided.                                                                           | Some privileging of girls' experience, use of deductive coding from past work.                                                                                           |
| Trustworthiness: Medium |                                                                                                                                                                                      |                                                                                                                                                         |                                                                                                                                    |                                                                                                                              | Relevance: Medium                                                                                                   |                                                                                                                                                                          |
| Ullrich 1992            | Single village ethnography. Unclear sampling.                                                                                                                                        | Unclear data collection. Community followed by researcher for many years.                                                                               | Not reported.                                                                                                                      | Unclear. Limited supporting quotations.                                                                                      | Depth, and some breadth.                                                                                            | Unclear.                                                                                                                                                                 |
| Trustworthiness: Low    |                                                                                                                                                                                      |                                                                                                                                                         |                                                                                                                                    |                                                                                                                              | Relevance: Low (research question limited relevance for review)                                                     |                                                                                                                                                                          |

|                           |                                                                                                                                                                                                             |                                                                                                                                        |                                                                                                                                                       |                                                                                                                                                                                       |                                                                                      |                                                                                                                             |
|---------------------------|-------------------------------------------------------------------------------------------------------------------------------------------------------------------------------------------------------------|----------------------------------------------------------------------------------------------------------------------------------------|-------------------------------------------------------------------------------------------------------------------------------------------------------|---------------------------------------------------------------------------------------------------------------------------------------------------------------------------------------|--------------------------------------------------------------------------------------|-----------------------------------------------------------------------------------------------------------------------------|
| Umeora 2008               | 12 rural communities selected by project director blinded to objectives. Women encountered by chance. IDI participants recruited from study communities.                                                    | 32 open ended survey questions. IDIs with 12 women >50 years. Unclear topic guide.                                                     | No description of qualitative analysis. No themes presented.                                                                                          | Some supporting quotations provided although no participant identifiers. No themes presented.                                                                                         | Limited breadth or depth.                                                            | Unclear question development, analytic process or reporting.                                                                |
| Trustworthiness: Low      |                                                                                                                                                                                                             |                                                                                                                                        |                                                                                                                                                       |                                                                                                                                                                                       | Relevance: Low                                                                       |                                                                                                                             |
| UN Women 2017             | Two regions selected for qualitative component. Purposive snowball sampling to access participants who met requirements.                                                                                    | FGDs with women and girls (n=5). Unclear topic guide.                                                                                  | No description of analytic process.                                                                                                                   | Some supporting quotations provided. Most illustrative of quantitative data rather than any iterative development. Some identification of challenges through qualitative approach.    | Lots of breadth but driven by quantitative component, unclear qualitative component. | Unclear. Some use of qualitative data but unclear use of iterative coding, largely illustrative.                            |
| Trustworthiness: Low      |                                                                                                                                                                                                             |                                                                                                                                        |                                                                                                                                                       |                                                                                                                                                                                       | Relevance: Medium                                                                    |                                                                                                                             |
| Wall 2016                 | Randomly selected households in 10 subdistricts (split of urban and rural).                                                                                                                                 | Semi structured survey approach with open ended questions. Open-ended questions reported.                                              | No analytic process reported. Largely quantification of open text responses. No themes.                                                               | Very limited quotation provided. Largely illustrative of quantitative approach.                                                                                                       | Breadth, but very little depth provided.                                             | No iterative themes. Semi-structured approach sought respondent-driven information but limited depth for qualitative study. |
| Trustworthiness: Low      |                                                                                                                                                                                                             |                                                                                                                                        |                                                                                                                                                       |                                                                                                                                                                                       | Relevance: Low                                                                       |                                                                                                                             |
| Wall 2018                 | Region selected alongside above study household survey. Selection of participants for qualitative study not reported.                                                                                       | No topic guides reported. Combination of IDIs and FGDs. Range of participants including both menstruating and not, and key informants. | No details provided on analytic process beyond 'synthesis to themes'. No reflexivity, saturation not noted. Unclear participation of authorship team. | Supporting quotations provided with some participant identification. No reported validation with participants.                                                                        | Breadth of findings presented with contextual depth.                                 | Unclear role of participant perspective in narrative summary produced. Mix of women's perspective with elders and males.    |
| Trustworthiness: Medium   |                                                                                                                                                                                                             |                                                                                                                                        |                                                                                                                                                       |                                                                                                                                                                                       | Relevance: Medium                                                                    |                                                                                                                             |
| WaterAid 2009             | Four districts selected purposively. One school per district. 'Articulate and willing' girls selected by teachers. Girls with 'noteworthy experience of school absence or other problems' selected for IDI. | FGDs, 1 per school. IDIs with one or two girls in each school. No stated topic guide.                                                  | Unclear analytic process.                                                                                                                             | Quotations sometimes illustrative of quantitative findings. Some case studies presented of worst experiences. Some emergent themes from qualitative work. No participant identifiers. | Reasonable breadth, some depth.                                                      | Unclear identification of themes. Mixed-methods approach but insufficient information on qualitative process.               |
| Trustworthiness: Medium   |                                                                                                                                                                                                             |                                                                                                                                        |                                                                                                                                                       |                                                                                                                                                                                       | Relevance: Medium                                                                    |                                                                                                                             |
| WWSSCC 2014               | Diverse region. 'menstrual hygiene management lab' set up. Convenience sample, unclear recruitment. Large sample.                                                                                           | FGDs. Vague topic guide. Stated observations of infrastructure but unclear methodology.                                                | No stated analytic process.                                                                                                                           | Some supporting quotations provided, not for all assertions. No participant identification.                                                                                           | Broad range of topics covered, but very limited depth of qualitative analysis.       | Mixed methods approach but unclear focus on women's reports compared to quantitative survey, past research and policy.      |
| Trustworthiness: Low      |                                                                                                                                                                                                             |                                                                                                                                        |                                                                                                                                                       |                                                                                                                                                                                       | Relevance: Medium                                                                    |                                                                                                                             |
| <b>Disorders and pain</b> |                                                                                                                                                                                                             |                                                                                                                                        |                                                                                                                                                       |                                                                                                                                                                                       |                                                                                      |                                                                                                                             |
| Aziato 2014               | Purposive sampling until saturation. Female university students and high school.                                                                                                                            | Some limited information provided on structured interview guide. IDIs.                                                                 | Clear description of analytic process. Validation with participants. Saturation noted.                                                                | Supportive quotations illustrate derived themes.                                                                                                                                      | Breadth and depth of findings reported, focused on pain only.                        | To a high degree. Findings validated with participants, analysis prioritise lived experience.                               |
| Trustworthiness: High     |                                                                                                                                                                                                             |                                                                                                                                        |                                                                                                                                                       |                                                                                                                                                                                       | Relevance: Medium                                                                    |                                                                                                                             |
| Hemachandra 2009          | Purposive sampling for more highly educated women in 6 geographic areas until saturation. Women with problems selected for follow up interviews.                                                            | Some information on individual interview topic guide provided. Unclear topic guide for FGDs.                                           | Clear description of rigorous analytic process.                                                                                                       | Findings supported by illustrative quotations with participant identifiers.                                                                                                           | Breadth and depth of analysis reported.                                              | Clear prioritisation of women's perspective, triangulation with key informants. FGDs and IDIs used.                         |
| Trustworthiness: High     |                                                                                                                                                                                                             |                                                                                                                                        |                                                                                                                                                       |                                                                                                                                                                                       | Relevance: Medium                                                                    |                                                                                                                             |
| Kavitha 2014              | Purposive sampling stated but no description of criteria, assumed some report of painful menses.                                                                                                            | No description of topic guide.                                                                                                         | Some description of analytic process. Unclear saturation. Single coder.                                                                               | No supportive quotations provided. Only superficial description of themes.                                                                                                            | Some breadth, no depth of themes reported.                                           | Unclear use of women's voices in analysis.                                                                                  |
| Trustworthiness: Low      |                                                                                                                                                                                                             |                                                                                                                                        |                                                                                                                                                       |                                                                                                                                                                                       | Relevance: Low                                                                       |                                                                                                                             |
| Titilayo 2009             | Unclear participant selection for qualitative component.                                                                                                                                                    | Brief information on interview topics.                                                                                                 | Stated Grounded theory, some description of coding process.                                                                                           | Limited qualitative quotations provided. Arguments supported with quotations, no participant identifiers.                                                                             | Some breadth, very little depth.                                                     | Some prioritisation of girls' perspectives. Unclear integration of qualitative with quantitative methods.                   |



|                         |                                                                                    |                                                                      |                                          |                                                                                                                                |                                       |                                                                                                          |
|-------------------------|------------------------------------------------------------------------------------|----------------------------------------------------------------------|------------------------------------------|--------------------------------------------------------------------------------------------------------------------------------|---------------------------------------|----------------------------------------------------------------------------------------------------------|
| Trustworthiness: Medium |                                                                                    |                                                                      |                                          |                                                                                                                                | Relevance: Medium                     |                                                                                                          |
| Walraven 2002           | Random sampling of women from each disorder group following cross-sectional survey | Brief information on interview topics provided. Unclear development. | No description of analytic process.      | Quotations provided describing disorders but not supporting other statements made in results. Little presentation of analysis. | Little breadth and no depth provided. | Unclear prioritisation of women's perspective. Some explanation of women's disorders in their own voice. |
| Trustworthiness: Low    |                                                                                    |                                                                      |                                          |                                                                                                                                | Relevance: Low                        |                                                                                                          |
| Wong 2011               | Recruitment from 11 schools in two districts. Some purposive sampling.             | Topic guide described. FGDs grouped by age, ethnicity.               | Limited description of analytic process. | Broad themes supported by illustrative quotations with participant identifiers.                                                | Some breadth, little depth of themes. | Analysis privileged girls experience, unclear involvement of women and girls in research process.        |
| Trustworthiness: Medium |                                                                                    |                                                                      |                                          |                                                                                                                                | Relevance: Medium                     |                                                                                                          |

FGD = Focus Group Discussion. IDI = Individual (In-depth) Interview).
